# Supplementary material
Source: ML conference proceedings conference paper supplement (https://proceedings.neurips.cc/paper_files/paper/2013/hash/dc912a253d1e9ba40e2c597ed2376640-Abstract.html)
Supplement: Supplementary file [file dc912a253d1e9ba40e2c597ed2376640-Supplemental.zip]

---

# Supplementary Materials:

## Trading Computation for Communication:

## Distributed Stochastic Dual Coordinate Ascent

---

**Tianbao Yang**

NEC Labs America, Cupertino, CA 95014

tyang@nec-labs.com

### 1 Proof of Theorem 1 and Theorem 2

For the proof of Theorem 1, we first prove the following Lemma.

**Lemma 1.** Assume that  $\phi_i^*(z)$  is  $\gamma$ -strongly convex function (where  $\gamma$  can be zero). Then for any  $t > 0$  and  $s \in [0, 1]$ , we have

$$\mathbb{E}[D(\alpha^t) - D(\alpha^{t-1})] \geq \frac{smK}{n} \mathbb{E}[P(w^{t-1}) - D(\alpha^{t-1})] - \left(\frac{smK}{n}\right)^2 \frac{G^t}{2\lambda}$$

where

$$G^t = \frac{1}{n} \sum_{i=1}^n \left(1 - \frac{\gamma(1-s)\lambda n}{smK}\right) (u_i^{t-1} - \alpha_i^{t-1})^2,$$

and  $u_i^{t-1} = -\nabla \phi_i(x_i^\top w^{t-1})$ .

*Proof of Lemma 1.* For simplicity, we let  $\mathcal{I}_m^k$  denote the random index  $\{i_1, \dots, i_m\}$  randomly sampled at iteration  $t$  in machine  $k$ . We begin by bounding the improvement in the dual objective. By the definition of  $D(\alpha)$ , we have

$$n[D(\alpha^t) - D(\alpha^{t-1})] = \underbrace{\left[ \sum_{k=1}^K \sum_{i \in \mathcal{I}_m^k} -\phi_{k,i}^*(-\alpha_{k,i}^t) - \lambda n g^*(v^t) \right]}_A - \underbrace{\left[ \sum_{k=1}^K \sum_{i \in \mathcal{I}_m^k} -\phi_{k,i}(\alpha_{k,i}^{t-1}) - \lambda n g^*(v^{t-1}) \right]}_B$$

By the definition of the update, we have

$$\begin{aligned} g^*(v^t) &= g^* \left( v^{t-1} + \frac{1}{\lambda n} \sum_{k=1}^K \sum_{i \in \mathcal{I}_m^k} \Delta \alpha_{k,i}^t x_{k,i} \right) \\ &\leq g^*(v^{t-1}) + \frac{1}{\lambda n} \sum_{k=1}^K \sum_{i \in \mathcal{I}_m^k} \Delta \alpha_{k,i}^t x_{k,i}^\top \nabla g^*(v^{t-1}) + \frac{1}{2} \left\| \frac{1}{\lambda n} \sum_{k=1}^K \sum_{i \in \mathcal{I}_m^k} \Delta \alpha_{k,i}^t x_{k,i} \right\|_2^2 \\ &= g^*(v^{t-1}) + \frac{1}{\lambda n} \sum_{k=1}^K \sum_{i \in \mathcal{I}_m^k} \Delta \alpha_{k,i}^t x_{k,i}^\top w^{t-1} + \frac{1}{2} \left\| \frac{1}{\lambda n} \sum_{k=1}^K \sum_{i \in \mathcal{I}_m^k} \Delta \alpha_{k,i}^t x_{k,i} \right\|_2^2 \\ &\leq g^*(v^{t-1}) + \frac{1}{\lambda n} \sum_{k=1}^K \sum_{i \in \mathcal{I}_m^k} \Delta \alpha_{k,i}^t x_{k,i}^\top w^{t-1} + \frac{mK}{2(\lambda n)^2} \sum_{k=1}^K \sum_{i \in \mathcal{I}_m^k} (\Delta \alpha_{k,i}^t)^2 \end{aligned}$$

where the first inequality uses the strong convexity of  $g^*$ , the second equality uses the fact  $w^{t-1} = \nabla g^*(v^{t-1})$ , and the last inequality uses the Cauchy-Schwarz inequality. Then we can bound  $A$  by

$$A \geq \sum_{k=1}^K \sum_{i \in \mathcal{I}_m^k} -\phi_{k,i}^*(-(\alpha_{k,i}^{t-1} + \Delta \alpha_{k,i}^t)) - \lambda n g^*(v^{t-1}) - \sum_{k=1}^K \sum_{i \in \mathcal{I}_m^k} \Delta \alpha_{k,i}^t x_{k,i}^\top w^{t-1} - \frac{mK}{2\lambda n} \sum_{k=1}^K \sum_{i \in \mathcal{I}_m^k} (\Delta \alpha_{k,i}^t)^2$$

We can further bound  $A$  as follows if we maximize R.H.S of above inequality over  $\Delta \alpha_{k,i}$  or if we restrict  $\Delta \alpha_{k,i} = s_{k,i}(u_{k,i}^{t-1} - \alpha_{k,i}^{t-1})$ , where  $u_{k,i}^{t-1} = -\nabla \phi_{k,i}(x_{k,i}^\top w^{t-1})$ .

$$\begin{aligned} A &\geq \sum_{k=1}^K \sum_{i \in \mathcal{I}_m^k} -\phi_{k,i}^*\left(-\alpha_{k,i}^{t-1} - s_{k,i}(u_{k,i}^{t-1} - \alpha_{k,i}^{t-1})\right) - \lambda n g^*(v^{t-1}) \\ &\quad - \sum_{k=1}^K \sum_{i \in \mathcal{I}_m^k} s_{k,i}(u_{k,i}^{t-1} - \alpha_{k,i}^{t-1}) x_{k,i}^\top w^{t-1} - \frac{mK}{2\lambda n} \sum_{k=1}^K \sum_{i \in \mathcal{I}_m^k} s_{k,i}^2 (u_{k,i}^{t-1} - \alpha_{k,i}^{t-1})^2 \\ &\geq \sum_{k=1}^K \sum_{i \in \mathcal{I}_m^k} \left[ -\phi_{k,i}^*(-\alpha_{k,i}^{t-1}) - s_{k,i} \phi_{k,i}^*(-u_{k,i}^{t-1}) + \frac{\gamma}{2} s_{k,i} (1 - s_{k,i}) (u_{k,i}^{t-1} - \alpha_{k,i}^{t-1})^2 \right] - \lambda n g^*(v^{t-1}) \\ &\quad - \sum_{k=1}^K \sum_{i \in \mathcal{I}_m^k} s_{k,i} (u_{k,i}^{t-1} - \alpha_{k,i}^{t-1}) x_{k,i}^\top w^{t-1} - \frac{mK}{2\lambda n} \sum_{k=1}^K \sum_{i \in \mathcal{I}_m^k} s_{k,i}^2 (u_{k,i}^{t-1} - \alpha_{k,i}^{t-1})^2 \end{aligned}$$

where in the first inequality, we use the strong convexity of  $\phi_{k,i}^*$ . Since  $s_{k,i}$  are maximized over the R.H.S of above inequalities, then we have for any  $s \in [0, 1]$

$$\begin{aligned} A &\geq \sum_{k=1}^K \sum_{i \in \mathcal{I}_m^k} \left[ -\phi_{k,i}^*(-\alpha_{k,i}^{t-1}) - s \phi_{k,i}^*(-u_{k,i}^{t-1}) + \frac{\gamma}{2} s(1-s)(u_{k,i}^{t-1} - \alpha_{k,i}^{t-1})^2 \right] - \lambda n g^*(v^{t-1}) \\ &\quad - \sum_{k=1}^K \sum_{i \in \mathcal{I}_m^k} s(u_{k,i}^{t-1} - \alpha_{k,i}^{t-1}) x_{k,i}^\top w^{t-1} - \frac{mK}{2\lambda n} \sum_{k=1}^K \sum_{i \in \mathcal{I}_m^k} s^2 (u_{k,i}^{t-1} - \alpha_{k,i}^{t-1})^2 \\ &= \sum_{k=1}^K \sum_{i \in \mathcal{I}_m^k} \left[ \underbrace{-s(\phi_{k,i}^*(-u_{k,i}^{t-1}) + x_{k,i}^\top w^{t-1} u_{k,i}^{t-1})}_{s \phi_{k,i}(x_{k,i}^\top w^{t-1})} \right] + \underbrace{\sum_{k=1}^K \sum_{i \in \mathcal{I}_m^k} -\phi_{k,i}^*(-\alpha_{k,i}^{t-1}) - \lambda n g^*(v^{t-1})}_B \\ &\quad + \frac{s}{2} \left( \gamma(1-s) - \frac{smK}{\lambda n} \right) \sum_{k=1}^K \sum_{i \in \mathcal{I}_m^k} (u_{k,i}^{t-1} - \alpha_{k,i}^{t-1})^2 + s \sum_{k=1}^K \sum_{i \in \mathcal{I}_m^k} \left[ \phi_{k,i}^*(-\alpha_{k,i}^{t-1}) + \alpha_{k,i}^{t-1} x_{k,i}^\top w^{t-1} \right] \\ &= s \sum_{k=1}^K \sum_{i \in \mathcal{I}_m^k} \left[ \phi_{k,i}(x_{k,i}^\top w^{t-1}) + \phi_{k,i}^*(-\alpha_{k,i}^{t-1}) + \alpha_{k,i}^{t-1} x_{k,i}^\top w^{t-1} \right] + B \\ &\quad + \frac{s}{2} \left( \gamma(1-s) - \frac{smK}{\lambda n} \right) \sum_{k=1}^K \sum_{i \in \mathcal{I}_m^k} (u_{k,i}^{t-1} - \alpha_{k,i}^{t-1})^2 \end{aligned}$$

Thus, we have

$$\begin{aligned} \frac{A-B}{s} &\geq \sum_{k=1}^K \sum_{i \in \mathcal{I}_m^k} \left[ \phi_{k,i}(x_{k,i}^\top w^{t-1}) + \phi_{k,i}^*(-\alpha_{k,i}^{t-1}) + \alpha_{k,i}^{t-1} x_{k,i}^\top w^{t-1} \right] \\ &\quad - \frac{s}{2\lambda} \left( \frac{mK}{n} - \frac{\gamma(1-s)\lambda}{s} \right) \sum_{k=1}^K \sum_{i \in \mathcal{I}_m^k} (u_{k,i}^{t-1} - \alpha_{k,i}^{t-1})^2 \end{aligned}$$

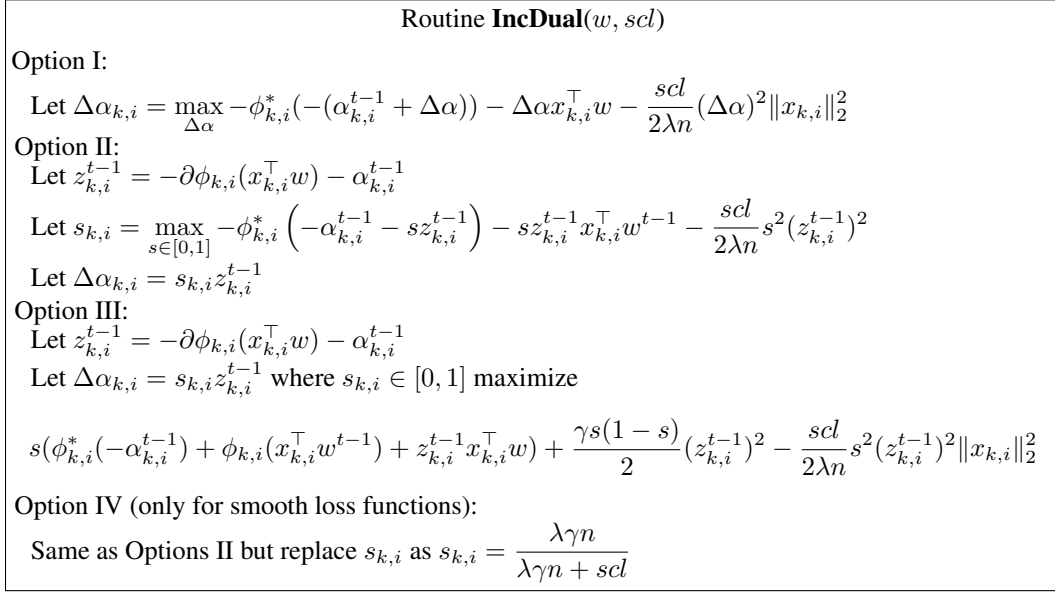

Figure 1: The Basic Variant of the DisDCA Algorithm (more options)

Taking expectation over  $i \in \mathcal{I}_m^k$ , we have

$$\begin{aligned}
\mathbb{E} \left[ \frac{A-B}{s} \right] &\geq \sum_{k=1}^K \frac{m}{n_k} \sum_{i=1}^{n_k} \left[ \phi_{k,i}(x_{k,i}^\top w^{t-1}) + \phi_{k,i}^*(-\alpha_{k,i}^{t-1}) + \alpha_{k,i}^{t-1} x_{k,i}^\top w^{t-1} \right] \\
&\quad - \frac{s}{2\lambda} \left( \frac{mK}{n} - \frac{\gamma(1-s)\lambda}{s} \right) \sum_{k=1}^K \frac{m}{n_k} \sum_{i=1}^{n_k} (u_{k,i}^{t-1} - \alpha_{k,i}^{t-1})^2 \\
&= \frac{mK}{n} \sum_{k=1}^K \sum_{i=1}^{n_k} \left[ \phi_{k,i}(x_{k,i}^\top w^{t-1}) + \phi_{k,i}^*(-\alpha_{k,i}^{t-1}) + \alpha_{k,i}^{t-1} x_{k,i}^\top w^{t-1} \right] \\
&\quad - \underbrace{\frac{s(mK)^2}{2\lambda n} \left( 1 - \frac{\gamma(1-s)\lambda n}{smK} \right) \frac{1}{n} \sum_{k=1}^K \sum_{i=1}^{n_k} (u_{k,i}^{t-1} - \alpha_{k,i}^{t-1})^2}_{G^t}
\end{aligned}$$

Note that with  $w^t = \nabla g^*(v^t)$ , we have  $g(w^t) + g^*(v^t) = (w^t)^\top v^t$  and

$$\begin{aligned}
P(w^{t-1}) - D(\alpha^{t-1}) &= \frac{1}{n} \sum_{k=1}^K \sum_{i=1}^{n_k} \phi_{k,i}(x_{k,i}^\top w^{t-1}) + \lambda g(w^{t-1}) - \left[ \frac{1}{n} \sum_{k=1}^K \sum_{i=1}^{n_k} -\phi_{k,i}^*(-\alpha_{k,i}^{t-1}) - \lambda g^*(v^{t-1}) \right] \\
&= \frac{1}{n} \sum_{k=1}^K \sum_{i=1}^{n_k} \left( \phi_{k,i}(x_{k,i}^\top w^{t-1}) + \phi_{k,i}^*(-\alpha_{k,i}^{t-1}) \right) + \lambda (w^{t-1})^\top v^{t-1} \\
&= \frac{1}{n} \sum_{k=1}^K \sum_{i=1}^{n_k} \left( \phi_{k,i}(x_{k,i}^\top w^{t-1}) + \phi_{k,i}^*(-\alpha_{k,i}^{t-1}) + \alpha_{k,i}^{t-1} x_{k,i}^\top w^{t-1} \right)
\end{aligned}$$

Therefore, we have

$$\mathbb{E}[D(\alpha^t) - D(\alpha^{t-1})] = \mathbb{E} \left[ \frac{A-B}{n} \right] \geq \frac{smK}{n} (P(w^{t-1}) - D(\alpha^{t-1})) - \frac{s^2(mK)^2}{2\lambda n^2} G^t$$

□

### 1.1 Proof of Theorem 1

We first prove the case of smooth loss function. We can apply Lemma 1 with  $s = \frac{\lambda\gamma n}{\lambda\gamma n + mK}$ . In this case,  $G^t = 0$ . Then we have

$$\mathbb{E}[D(\alpha^t) - D(\alpha^{t-1})] \geq \frac{smK}{n} \mathbb{E}[P(w^{t-1}) - D(\alpha^{t-1})]$$

Since  $\epsilon_D^{(t-1)} = D(\alpha_*) - D(\alpha^{t-1}) \leq P(w^{t-1}) - D(\alpha^{t-1})$ , and  $D(\alpha^t) - D(\alpha^{t-1}) = \epsilon_D^{t-1} - \epsilon_D^t$ , we obtain

$$\begin{aligned} \mathbb{E}[\epsilon_D^{(t)}] &\leq \left(1 - \frac{smK}{n}\right) \mathbb{E}[\epsilon_D^{(t-1)}] \leq \left(1 - \frac{smK}{n}\right)^t \mathbb{E}[\epsilon_D^{(0)}] \leq \left(1 - \frac{smK}{n}\right)^t \leq \exp\left(-\frac{smKt}{n}\right) \\ &= \exp\left(-\frac{\lambda\gamma mKt}{\lambda\gamma n + mK}\right) \end{aligned}$$

where we use that fact  $\epsilon_D^{(0)} = D(\alpha_*) - D(0) \leq 1$ , due to that  $D(0) \geq 0, D(\alpha) \leq P(w^*) \leq P(0) \leq 1$ . It is then easy to check that in order to have  $\mathbb{E}[\epsilon_D^{(T)}] \leq \epsilon_D$ , it suffices to have

$$T \geq \left(\frac{n}{mK} + \frac{1}{\lambda\gamma}\right) \log(1/\epsilon_D)$$

Furthermore,

$$\begin{aligned} \mathbb{E}[P(w^t) - D(\alpha^t)] &\leq \frac{n}{smK} \mathbb{E}[\epsilon_D^{(t)} - \epsilon_D^{(t+1)}] \leq \frac{n}{smK} \mathbb{E}[\epsilon_D^{(t)}], \text{ and therefore} \\ \sum_{t=T_0}^{T-1} \mathbb{E}[P(w^t) - D(\alpha^t)] &\leq \frac{n}{smK} \mathbb{E}[\epsilon_D^{(T_0)} - \epsilon_D^{(T)}] \leq \frac{n}{smK} \mathbb{E}[\epsilon_D^{(T_0)}] \end{aligned}$$

We can complete the proof of Theorem 1 for the smooth loss function by plugging the values of  $T$  and  $T_0$ .

### 1.2 Proof of Theorem 2

Next, we prove the case of  $L$ -Lipschitz continuous loss function. We let  $\gamma = 0$  in Lemma 1, and obtain

$$\mathbb{E}[D(\alpha^t) - D(\alpha^{t-1})] \geq \frac{smK}{n} \mathbb{E}[P(w^{t-1}) - D(\alpha^{t-1})] - \frac{(smK)^2}{2n^2\lambda} G^t$$

where  $G^t$  is equal to

$$G^t = \frac{1}{n} \sum_{i=1}^n (u_i^{t-1} - \alpha_i^{t-1})^2$$

Following Lemma 4 in , we can bound  $G^t$  by  $G^t \leq 4L^2$ . Let  $G = \max_t G^t$ . We have

$$\mathbb{E}[D(\alpha^t) - D(\alpha^{t-1})] \geq \frac{smK}{n} \mathbb{E}[P(w^{t-1}) - D(\alpha^{t-1})] - \left(\frac{smK}{n}\right)^2 \frac{G}{2\lambda}$$

Similarly, the inequality above indicates the following inequality,

$$\mathbb{E}[\epsilon_D^{(t)}] \leq \left(1 - \frac{smK}{n}\right) \mathbb{E}[\epsilon_D^{(t-1)}] + \left(\frac{smK}{n}\right)^2 \frac{G}{2\lambda} \quad (1)$$

We prove similarly as the following inequality holds.

$$\epsilon_D^{(t)} \leq \frac{2G}{\lambda(2n/(mK) + t - t_0)} \quad (2)$$

for all  $t \geq t_0 = \max\left(0, \left\lceil n/(mK) \log\left(2\lambda n \epsilon_D^{(0)} / (GmK)\right) \right\rceil\right)$ . In order to have  $\epsilon_D^t \leq \epsilon_D$ , it suffice to have

$$T \geq \frac{2G}{\lambda\epsilon_D} + t_0 - \frac{2n}{mK}$$

Furthermore, we have

$$\mathbb{E}[P(\bar{w}^T) - D(\bar{\alpha}^T)] \leq \frac{n}{smK(T - T_0)} \mathbb{E}[D(\alpha_*) - D(\alpha^{T_0})] + \frac{G}{2\lambda(T - T_0)} \leq \frac{2G}{\lambda(T_0 + 1)} + \frac{GsmK}{2\lambda n}$$

where  $\bar{w}^T = \sum_{t=T_0}^{T_1} w^t / (T - T_0)$  and  $\bar{\alpha}^T = \sum_{t=T_0}^T \alpha^t / (T - T_0)$ . If  $T \geq T_0 + \frac{n}{mK}$ , we can set  $s = n / (mK(T - T_0))$  and obtain

$$\mathbb{E}[P(\bar{w}^T) - D(\bar{\alpha}^T)] \leq \mathbb{E}[D(\alpha_*) - D(\alpha^{T_0})] + \frac{G}{2\lambda(T - T_0)} \leq \frac{2G}{\lambda(2n/(mK) - t_0 + T_0)} + \frac{G}{2\lambda(T - T_0)}$$

In order to have  $P(\bar{w}^T) - D(\bar{\alpha}^T) \leq \epsilon_P$ , it suffice to have

$$T_0 \geq \frac{4G}{\lambda\epsilon_P} - \frac{2n}{mK} + t_0, \quad \text{and} \quad T \geq T_0 + \frac{G}{\lambda\epsilon_P}$$

## 2 Derivations of Subproblems in DisDCA and ADMM

We consider the  $\ell_2$  regularization where  $g(v) = \frac{1}{2}\|v\|_2^2$ ,  $w = v$ . Then at  $t$ -th each iteration, we aim to maximize the dual objective on the sampled data points, i.e.,

$$\begin{aligned} \max_{\alpha^t} \quad & \sum_{k=1}^K \sum_{i \in \mathcal{I}_m^k} -\phi_{k,i}^*(-\alpha_{k,i}^t) - \frac{\lambda n}{2} \|w^t\|_2^2 \\ & = \sum_{k=1}^K \sum_{i \in \mathcal{I}_m^k} -\phi_{k,i}^*(-\alpha_{k,i}^t) - \frac{\lambda n}{2} \left\| w^{t-1} + \frac{1}{\lambda n} \sum_{k=1}^K \sum_{i \in \mathcal{I}_m^k} \Delta \alpha_{k,i}^t x_{k,i} \right\|_2^2 \\ & \geq \sum_{k=1}^K \sum_{i \in \mathcal{I}_m^k} -\phi_{k,i}^*(-\alpha_{k,i}^t) - \frac{\lambda n_k}{2} \sum_{k=1}^K \left\| w^{t-1} + \frac{1}{\lambda n_k} \sum_{i \in \mathcal{I}_m^k} \Delta \alpha_{k,i}^t x_{k,i} \right\|_2^2 \\ & = \sum_{k=1}^K \left( \sum_{i \in \mathcal{I}_m^k} -\phi_{k,i}^*(-\alpha_{k,i}^t) - \frac{\lambda n_k}{2} \left\| w^{t-1} + \frac{1}{\lambda n_k} \sum_{i \in \mathcal{I}_m^k} \Delta \alpha_{k,i}^t x_{k,i} \right\|_2^2 \right) \\ & = \sum_{k=1}^K \left( \sum_{i \in \mathcal{I}_m^k} -\phi_{k,i}^*(-\alpha_{k,i}^t) - \frac{\lambda n_k}{2} \left\| \hat{w}_k^{t-1} + \frac{1}{\lambda n_k} \sum_{i \in \mathcal{I}_m^k} \alpha_{k,i}^t x_{k,i} \right\|_2^2 \right) \end{aligned}$$

where  $\hat{w}_k^{t-1} = w^{t-1} - \frac{1}{\lambda n_k} \sum_{i \in \mathcal{I}_m^k} \alpha_{k,i}^{t-1} x_{k,i}$ . Therefore in each machine the goal of each update is to maximize the following

$$\max_{\alpha} \quad \frac{1}{n_k} \sum_{i=1}^m -\phi_i^*(-\alpha_i^t) - \frac{\lambda}{2} \left\| \hat{w}^{t-1} + \frac{1}{\lambda n_k} \sum_{i=1}^m \alpha_i^t x_i \right\|_2^2$$

where we suppress the subscript  $k$ . The above problem has the following primal problem:

$$\min_w \quad \frac{1}{n_k} \sum_{i=1}^m \phi_i(x_i^\top w) + \frac{\lambda}{2} \left\| w - \left( w^{t-1} - \frac{1}{\lambda n_k} \sum_{i=1}^m \alpha_i^{t-1} x_i \right) \right\|_2^2$$

To see this, we have

$$\begin{aligned} & \min_w \quad \frac{1}{n_k} \sum_{i=1}^m \phi_i(x_i^\top w) + \frac{\lambda}{2} \left\| w - \left( w^{t-1} - \frac{1}{\lambda n_k} \sum_{i=1}^m \alpha_i^{t-1} x_i \right) \right\|_2^2 \\ & = \min_w \quad \frac{1}{n_k} \sum_{i=1}^m \max_{\alpha_i} -x_i^\top w \alpha_i - \phi_i^*(-\alpha_i) + \frac{\lambda}{2} \left\| w - \left( w^{t-1} - \frac{1}{\lambda n_k} \sum_{i=1}^m \alpha_i^{t-1} x_i \right) \right\|_2^2 \\ & = \max_{\alpha} \min_w \quad \frac{1}{n_k} \sum_{i=1}^m -x_i^\top w \alpha_i - \phi_i^*(-\alpha_i) + \frac{\lambda}{2} \left\| w - \left( w^{t-1} - \frac{1}{\lambda n_k} \sum_{i=1}^m \alpha_i^{t-1} x_i \right) \right\|_2^2 \end{aligned}$$

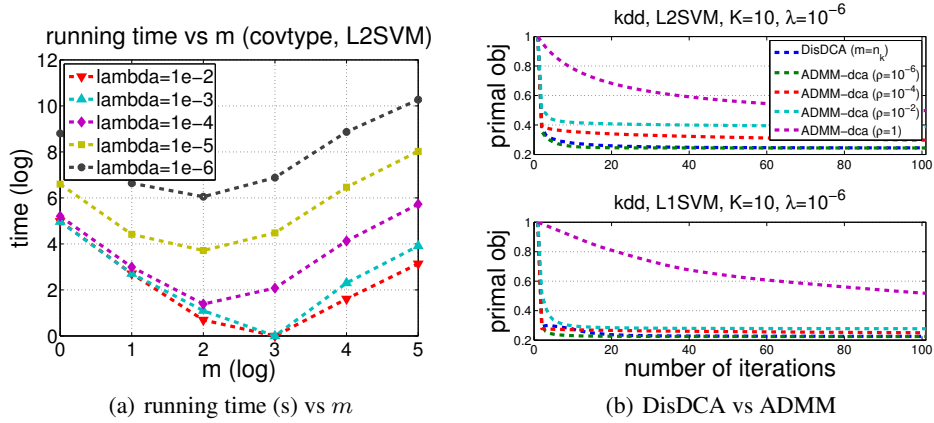

We can first compute the minimization to obtain  $w = w^{t-1} - \frac{1}{\lambda n_k} \sum_i \alpha_i^{t-1} x_i + \frac{1}{\lambda n_k} \alpha_i x_i$  and then we plug this into above problem, yielding

$$\max_{\alpha} \quad \frac{1}{n_k} \sum_{i=1}^m -\phi_i^*(-\alpha_i) - \frac{\lambda}{2} \left\| \hat{w}^{t-1} + \frac{1}{\lambda n_k} \sum_{i=1}^m \alpha_i x_i \right\|_2^2$$

In ADMM, the primal objective is decomposed across the examples by imposing equality constraints

$$\begin{aligned} \max_{w_1, \dots, w_k, w} \quad & \frac{1}{n} \sum_{k=1}^K \sum_{i=1}^{n_k} \phi_{k,i}(w_k^\top x_{k,i}) + \frac{\lambda}{2} \|w\|_2^2 \\ \text{s.t.} \quad & w_1 = \dots = w \end{aligned}$$

To solve the problem, a Lagrangian function is constructed

$$L(w_1, \dots, w_k, w, u_1, \dots, u_k) = \frac{1}{n} \sum_{k=1}^K \sum_{i=1}^{n_k} \phi_{k,i}(w_k^\top x_{k,i}) + \frac{\lambda}{2} \|w\|_2^2 + \rho \sum_{k=1}^K u_k^\top (w_k - w) + \frac{\rho}{2} \sum_{k=1}^K \|w_k - w\|_2^2$$

Then  $\{w_k\}, w, u$  are optimized alternatively by

$$\begin{aligned} w_k^t &= \arg \min_{w_k} \frac{1}{n} \sum_{i=1}^{n_k} \phi_{k,i}(w_k^\top x_{k,i}) + \frac{\rho}{2} \|w_k - (w^{t-1} - u_k^{t-1})\|_2^2 \\ w^t &= \arg \min_w \frac{\lambda}{2} \|w\|_2^2 + \rho \sum_{k=1}^K u_k^\top (w_k - w) + \frac{\rho}{2} \sum_{k=1}^K \|w_k - w\|_2^2 \\ u_k^t &= u_k^{t-1} + w_k^t - w^t \end{aligned}$$

### 3 More Experimental Results

We show more experiments in this section. Figure 2(a) presents the running time (for obtaining a duality gap less than 0.01) versus the values of  $m$  for different  $\lambda$  and fixed  $K = 5$ . The results clearly demonstrate the tradeoff incurred by  $m$ , and also that the effective region of  $m$  becomes smaller as  $\lambda$  becomes smaller. Figure 2(b) compares the practical variant of DisDCA vs ADMM with different penalty parameters. Figure 2 show more experiments by varying  $m$  and  $K$  under different settings. Figure 4 compares the different variants of DisDCA.

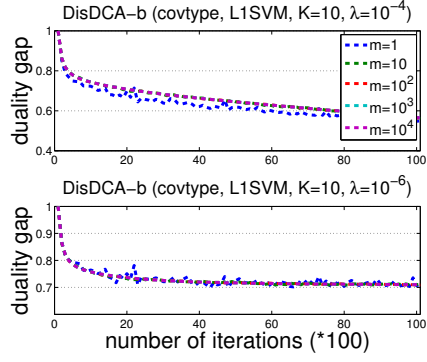

(c) varying  $m$

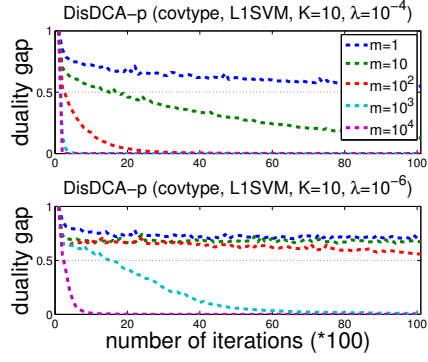

(d) varying  $m$

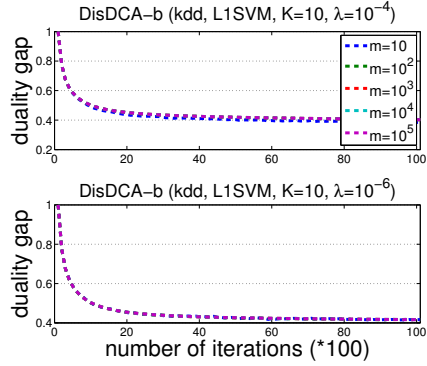

(e) varying  $m$

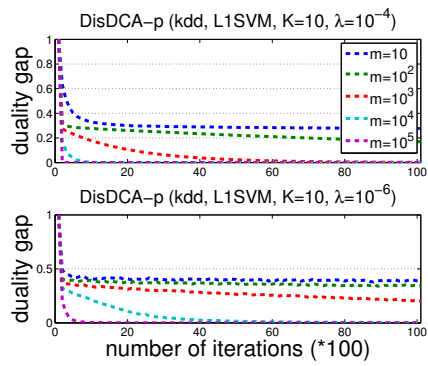

(f) varying  $m$

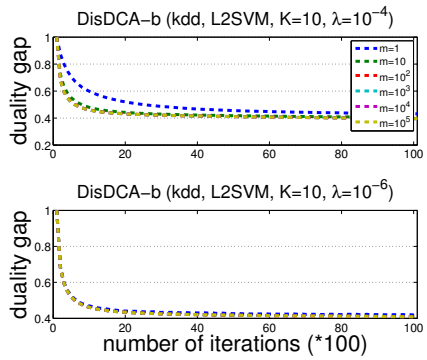

(g) varying  $m$

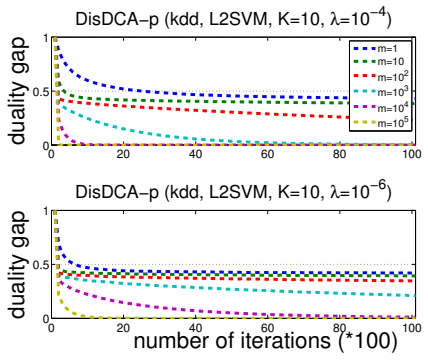

(h) varying  $m$

Figure 2: (a~d): duality gap with different  $m$

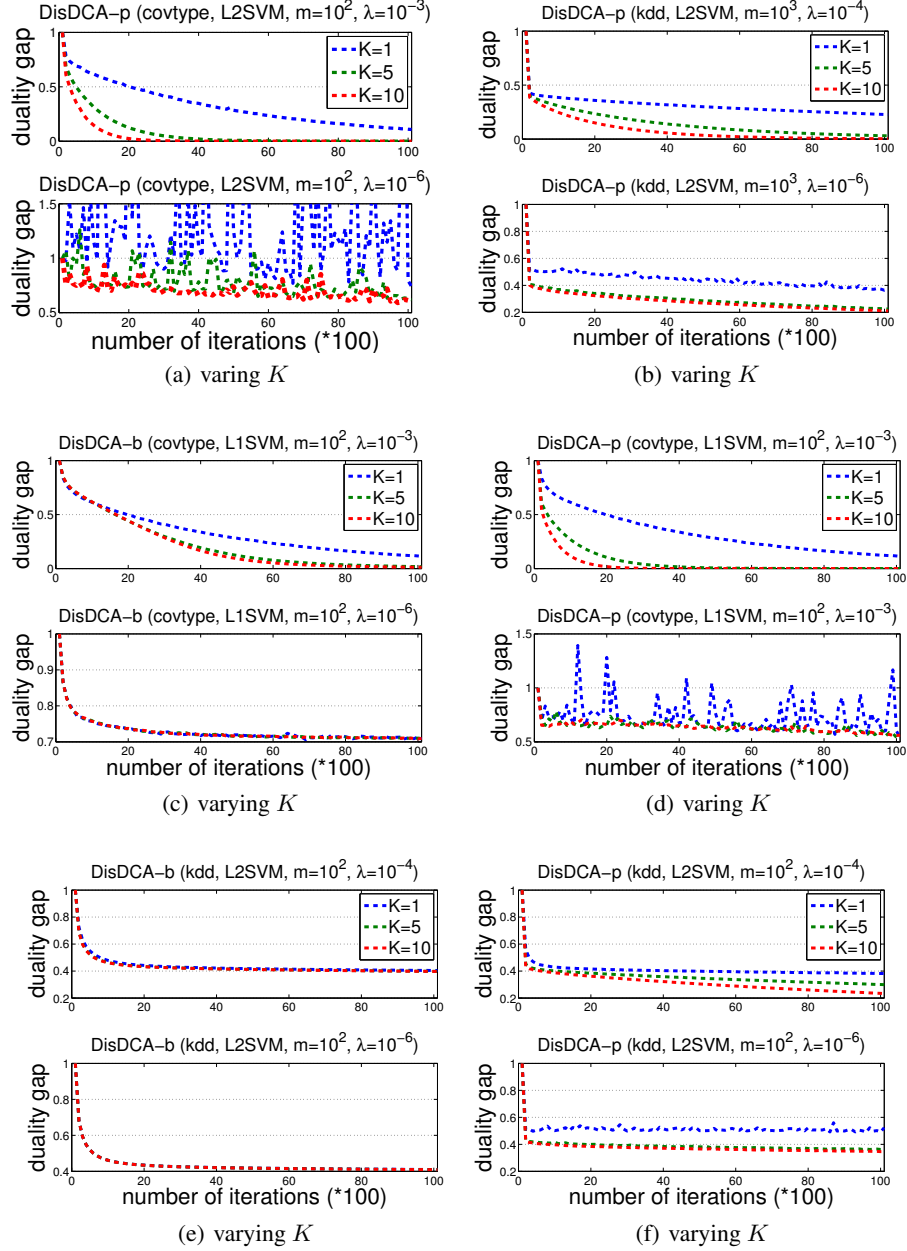

Figure 3: duality gap with different  $K$



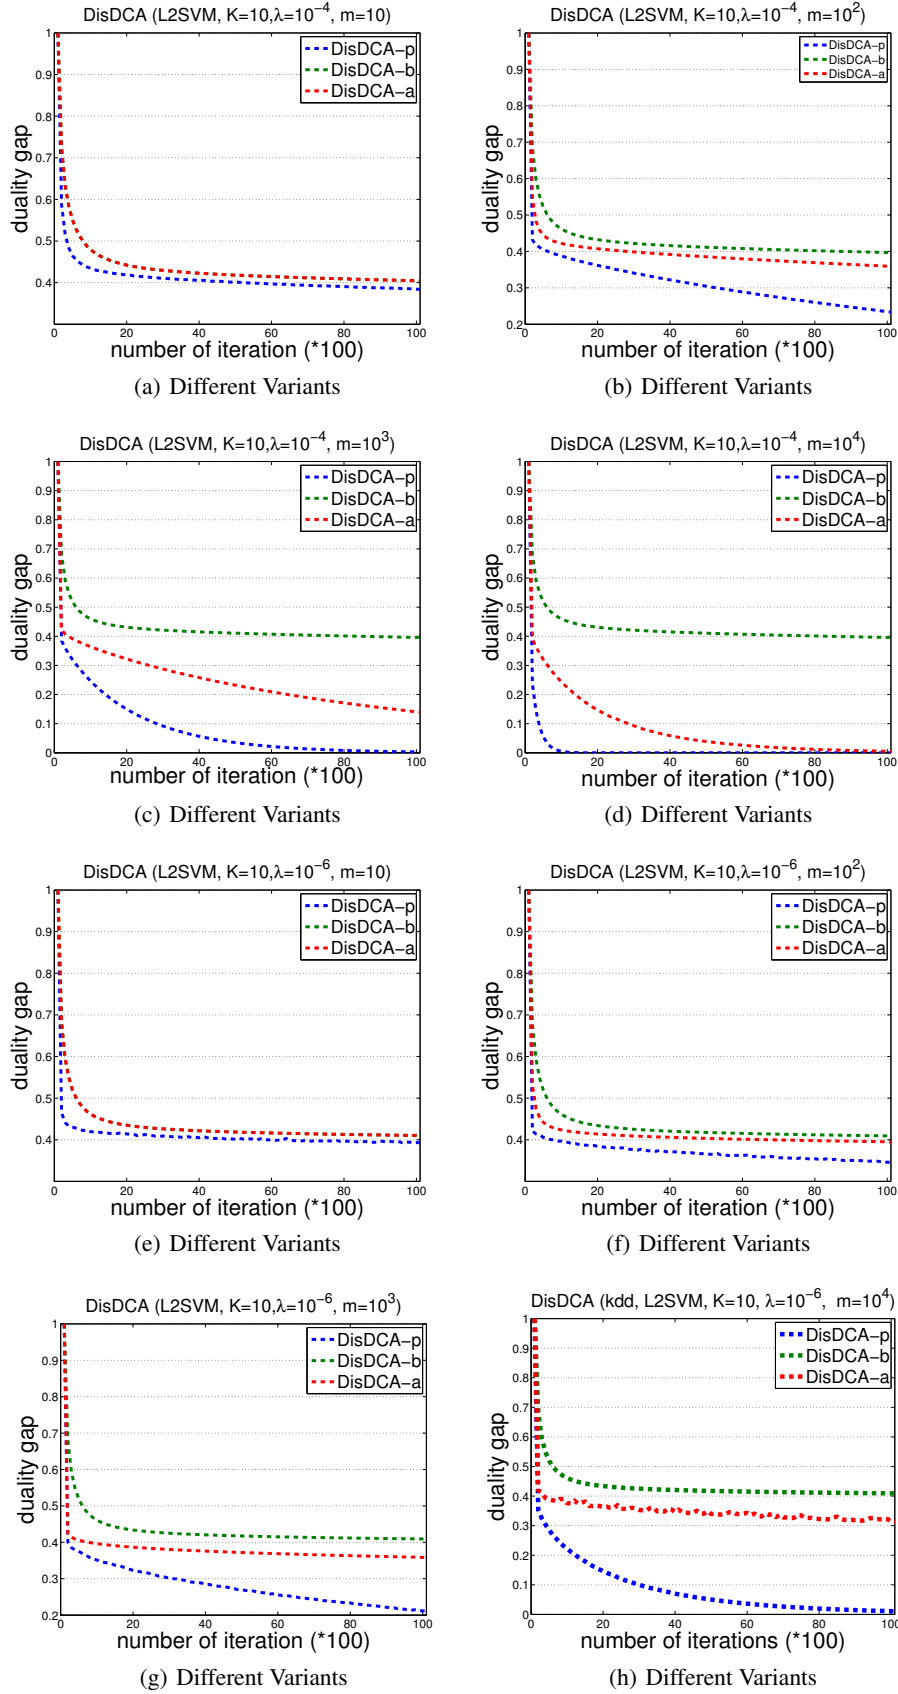

Figure 4: comparison of different variants of DisDCA with different  $m$  and  $\lambda$  on kdd data.
